# Supplementary material for: Prognostic Value of Calculated Plasma Volume Status in Patients Admitted for Acute Decompensated Heart Failure ― A Prospective Comparative Study With Other Indices of Plasma Volume ―
Source: PubMed Central journal article supplement — Circ Rep. 2019 Aug 24;1(9):361–71. doi: 10.1253/circrep.CR-19-0039 (PMC7892481; doi:10.1253/circrep.cr-19-0039), 2019-08-24
Supplement: circrep-1-361-s001.pdf [file circrep-1-361-s001.pdf]

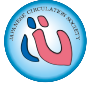

---

**Prognostic Value of Calculated Plasma Volume Status in  
Patients Admitted for Acute Decompensated Heart Failure**  
— A Prospective Comparative Study With  
Other Indices of Plasma Volume —

---

Shunsuke Tamaki, MD, PhD; Takahisa Yamada, MD, PhD; Takashi Morita, MD, PhD;  
Yoshio Furukawa, MD, PhD; Yusuke Iwasaki, MD; Masato Kawasaki, MD;  
Atsushi Kikuchi, MD; Tsutomu Kawai, MD; Masahiro Seo, MD; Makoto Abe, MD;  
Jun Nakamura, MD; Kyoko Yamamoto, MD; Kiyomi Kayama, MD;  
Masatsugu Kawahira, MD; Kazuya Tanabe, MD; Kunpei Ueda, MD;  
Takanari Kimura, MD; Daisuke Sakamoto, MD; Masatake Fukunami, MD, PhD

Supplementary Table. Univariate and Multivariate Cox Analysis for Cardiac Death, Non-cardiac Death, and Unplanned Hospitalization for Worsening Heart Failure.

|                                                                               | HR (95% CI)            | p-value  |
|-------------------------------------------------------------------------------|------------------------|----------|
| <i>Cox analysis for cardiac death</i>                                         |                        |          |
| PVS at admission                                                              |                        |          |
| Unadjusted                                                                    | 1.0449 (1.0281-1.0620) | < 0.0001 |
| Adjusted model *                                                              | 1.0337 (1.0148-1.0529) | 0.0004   |
| PVS at discharge                                                              |                        |          |
| Unadjusted                                                                    | 1.0445 (1.0293-1.0599) | < 0.0001 |
| Adjusted model *                                                              | 1.0351 (1.0183-1.0522) | < 0.0001 |
| $\Delta$ PVS                                                                  |                        |          |
| Unadjusted                                                                    | 1.0434 (1.0124-1.0755) | 0.0058   |
| Adjusted model *                                                              | 1.0364 (1.0028-1.0711) | 0.0337   |
| <i>Cox analysis for non-cardiac death</i>                                     |                        |          |
| PVS at admission                                                              |                        |          |
| Unadjusted                                                                    | 1.0332 (1.0192-1.0475) | < 0.0001 |
| Adjusted model *                                                              | 1.0206 (1.0044-1.0369) | 0.0123   |
| PVS at discharge                                                              |                        |          |
| Unadjusted                                                                    | 1.0293 (1.0165-1.0423) | < 0.0001 |
| Adjusted model *                                                              | 1.0205 (1.0062-1.0349) | 0.0048   |
| $\Delta$ PVS                                                                  |                        |          |
| Unadjusted                                                                    | 1.0112 (0.9827-1.0405) | 0.4442   |
| Adjusted model *                                                              | 1.0220 (0.9917-1.0531) | 0.1560   |
| <i>Cox analysis for unplanned hospitalization for worsening heart failure</i> |                        |          |
| PVS at admission                                                              |                        |          |
| Unadjusted                                                                    | 1.0221 (1.0110-1.0333) | 0.0001   |
| Adjusted model *                                                              | 1.0126 (1.0001-1.0253) | 0.0486   |
| PVS at discharge                                                              |                        |          |
| Unadjusted                                                                    | 1.0185 (1.0087-1.0283) | 0.0002   |
| Adjusted model *                                                              | 1.0113 (1.0004-1.0223) | 0.0413   |
| $\Delta$ PVS                                                                  |                        |          |
| Unadjusted                                                                    | 1.0065 (0.9840-1.0295) | 0.5757   |
| Adjusted model *                                                              | 1.0084 (0.9857-1.0317) | 0.4697   |

\* Adjusted for age, left ventricular ejection fraction at admission, estimated glomerular filtration rate at admission, and plasma brain natriuretic peptide at discharge.

Additional abbreviations as outlined in Tables 2 and 3.
